# Supplementary material for: Mass Spectrometric Identification of Urinary Biomarkers of Pulmonary Tuberculosis
Source: PubMed Central journal article supplement — eBioMedicine. 2018 Apr 22;31:157–65. doi: 10.1016/j.ebiom.2018.04.014 (PMC6013777; doi:10.1016/j.ebiom.2018.04.014), 2018-04-22
Supplement: mmc1.pdf [file mmc1.pdf]

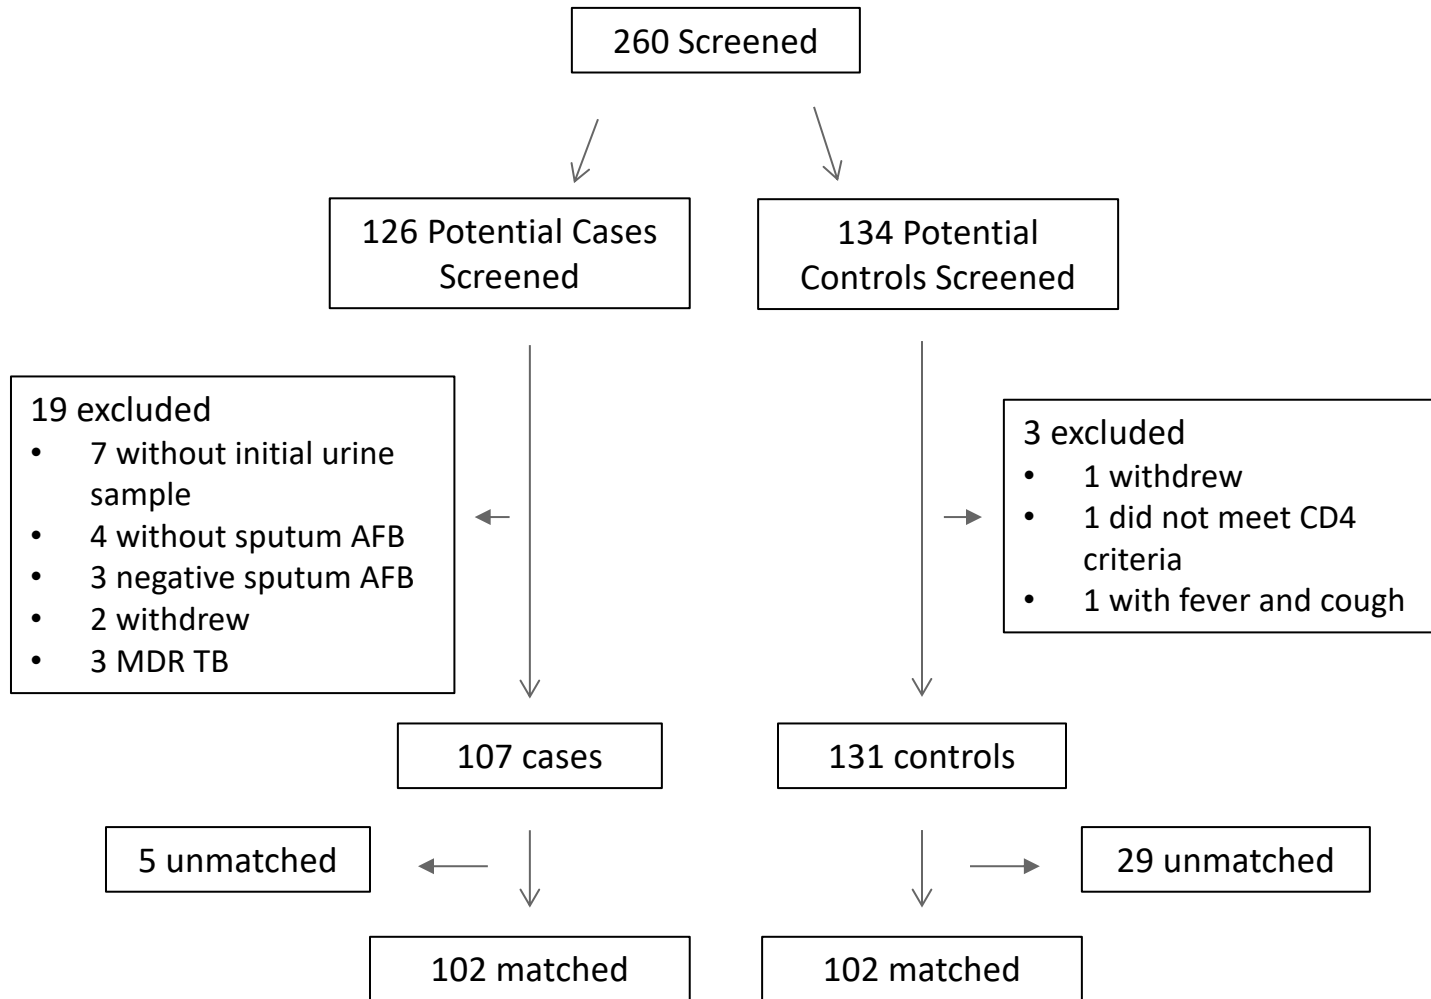

**Supplementary Figure 1: Discovery Cohort Study Enrollment (Haiti)**

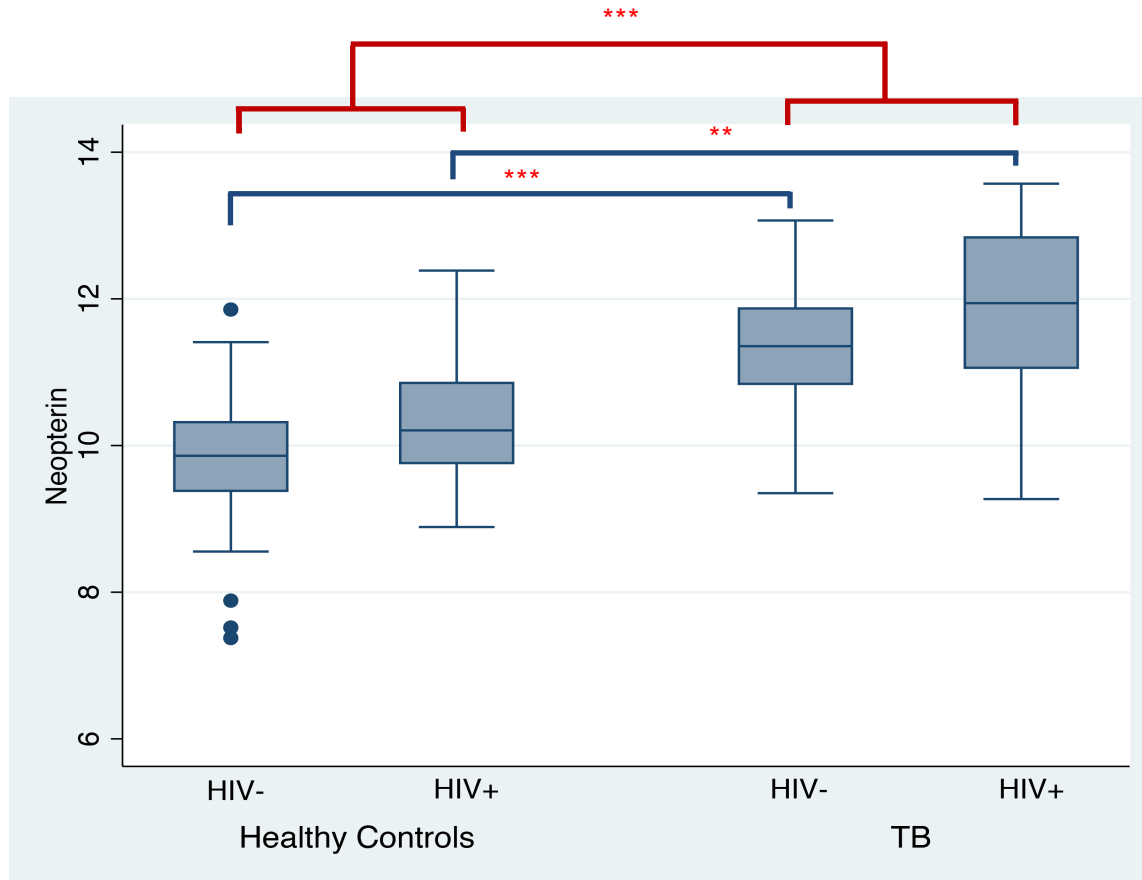

**Supplementary Figure 2: Levels of Neopterin in HIV Infected and Uninfected Participants.** Box plots showing abundance of neopterin in the discovery cohort when comparing HIV infected (n=31) and HIV uninfected participants (n=173). After adjustment for HIV status neopterin remains significantly increased in active TB. Abundance is shown on Log2 scale. Wilcoxon rank some test. \*\* p-value <0.001, \*\*\* p-value <0.0001.

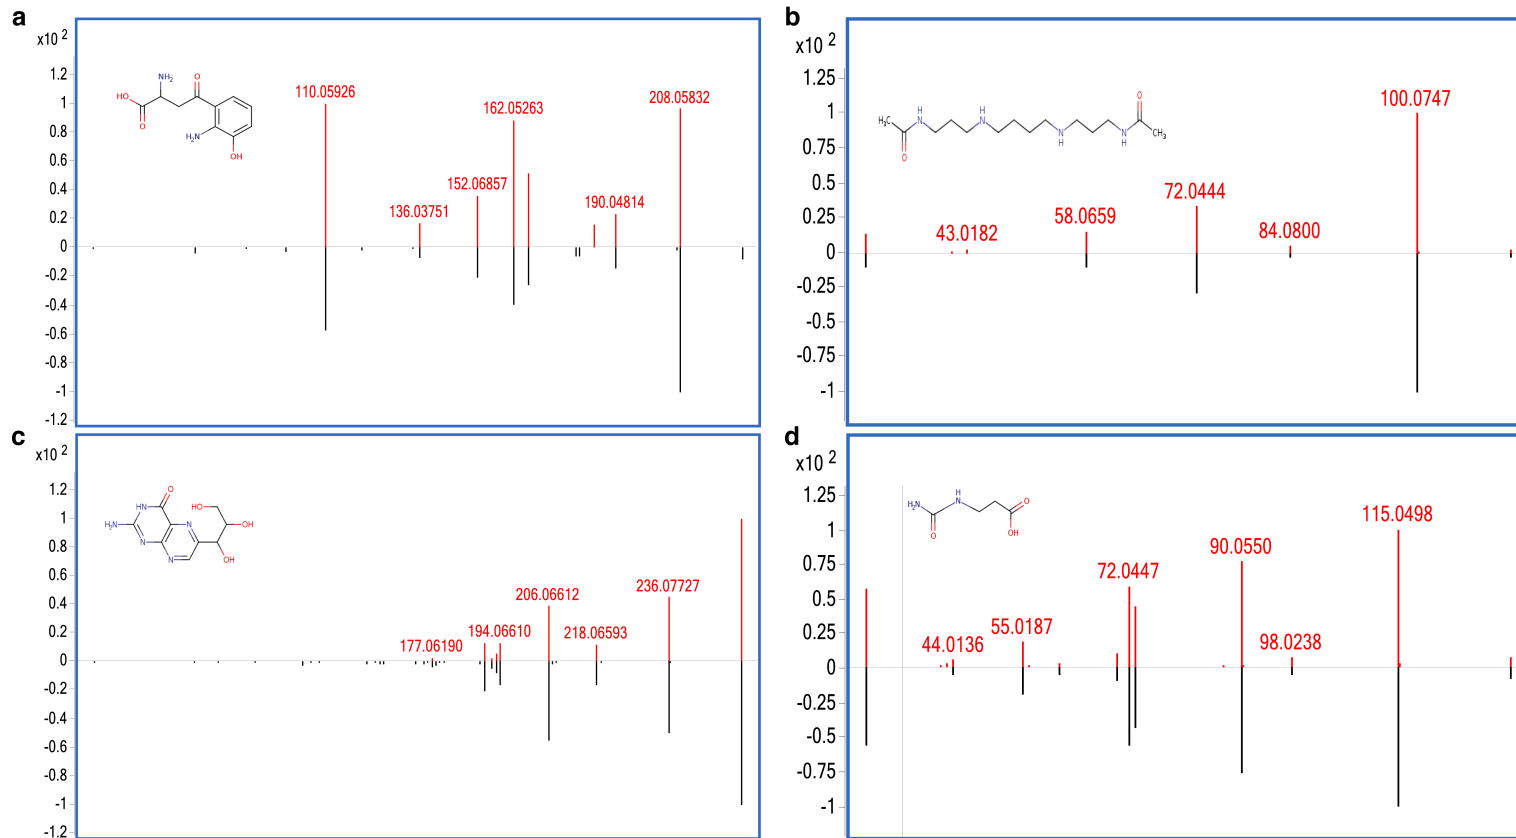

**Supplementary Figure 3: MS/MS Spectra of Identified Metabolites Compared to Pure Chemical Standard.**

Mirror plots showing MS/MS spectra of identified metabolites from representative urine sample (red) compared with chemical standard (black). (a) Hydroxykynurenine (m/z 225.0845) (b) Diacetylspermine (m/z 144.1241) (c) Neopterin (m/z 254.0859) (d) Ureidopropionic acid (m/z 133.0600). Parent mass is shown on far right. Chemical structure shown on top left.

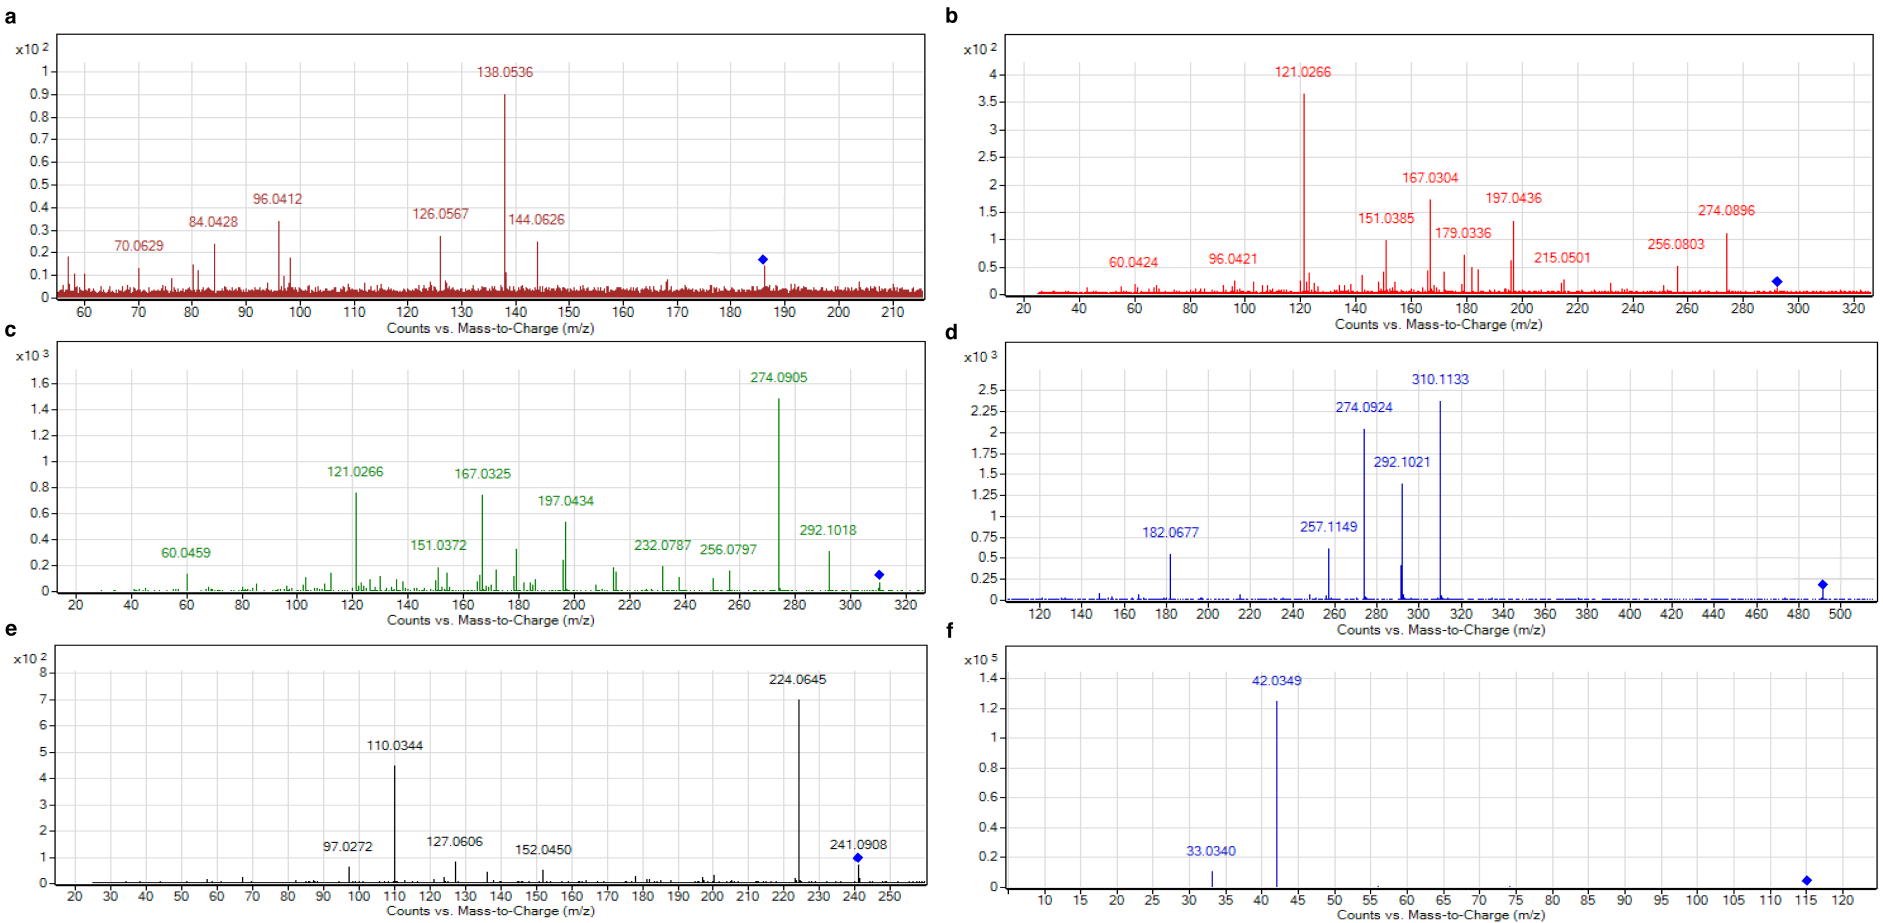

**Supplementary Figure 4: MS/MS Spectra of Unverified Metabolites.** Each metabolite is seen at a collision energy (CE) of 10. (a) N-Acetylhexosamine, (b) Sialic Acid 1, (c) Sialic acid 2, (d) Sialic acid 3, (e) Unknown 1, (f) Unknown 2

**a**

| Discovery Set Not Normalized to Creatinine |     |        |           |                      |
|--------------------------------------------|-----|--------|-----------|----------------------|
| m/z                                        | Obs | AUC    | Std. Err. | [95% Conf. Interval] |
| 115.0498                                   | 66  | 0.9449 | 0.0246    | 0.89676 - 0.99305    |
| 133.0600                                   | 66  | 0.9495 | 0.0229    | 0.90455 - 0.99444    |
| 144.1241                                   | 66  | 0.9780 | 0.0137    | 0.95103 - 1.00000    |
| 186.0762                                   | 66  | 0.9660 | 0.0304    | 0.90643 - 1.00000    |
| 225.0845                                   | 66  | 0.9082 | 0.0351    | 0.83940 - 0.97695    |
| 241.0903                                   | 66  | 0.8255 | 0.0523    | 0.72301 - 0.92804    |
| 254.0859                                   | 66  | 0.9725 | 0.0204    | 0.93243 - 1.00000    |
| 292.0995                                   | 66  | 0.9008 | 0.0434    | 0.81578 - 0.98587    |
| 310.1148                                   | 66  | 0.9587 | 0.0315    | 0.89688 - 1.00000    |
| 491.1754                                   | 66  | 0.9458 | 0.0342    | 0.87885 - 1.00000    |

**b**

| Validation Set Not Normalized to Creatinine |     |        |           |                      |
|---------------------------------------------|-----|--------|-----------|----------------------|
| m/z                                         | Obs | AUC    | Std. Err. | [95% Conf. Interval] |
| 115.0498                                    | 88  | 0.5752 | 0.0617    | 0.45430 - 0.69609    |
| 133.0600                                    | 88  | 0.6672 | 0.0577    | 0.55406 - 0.78031    |
| 144.1241                                    | 88  | 0.8052 | 0.0470    | 0.71296 - 0.89737    |
| 186.0762                                    | 88  | 0.8114 | 0.0454    | 0.72236 - 0.90038    |
| 225.0845                                    | 88  | 0.6119 | 0.0607    | 0.49287 - 0.73090    |
| 241.0903                                    | 88  | 0.6925 | 0.0576    | 0.57952 - 0.80550    |
| 254.0859                                    | 88  | 0.7871 | 0.0472    | 0.69454 - 0.87962    |
| 292.0995                                    | 88  | 0.7773 | 0.0500    | 0.67928 - 0.87524    |
| 310.1148                                    | 88  | 0.7313 | 0.0536    | 0.62614 - 0.83639    |
| 491.1754                                    | 87  | 0.7762 | 0.0504    | 0.67750 - 0.87488    |

**c**

| Discovery Set Normalized to Creatinine |     |        |           |                      |
|----------------------------------------|-----|--------|-----------|----------------------|
| m/z                                    | Obs | AUC    | Std. Err. | [95% Conf. Interval] |
| 115.0498                               | 66  | 0.9440 | 0.0255    | 0.89398 - 0.99399    |
| 133.0600                               | 66  | 0.9486 | 0.0260    | 0.89753 - 0.99962    |
| 144.1241                               | 66  | 0.9697 | 0.0166    | 0.93710 - 1.00000    |
| 186.0762                               | 66  | 0.9559 | 0.0317    | 0.89377 - 1.00000    |
| 225.0845                               | 66  | 0.9229 | 0.0313    | 0.86153 - 0.98420    |
| 241.0903                               | 66  | 0.8457 | 0.0478    | 0.75205 - 0.93941    |
| 254.0859                               | 66  | 0.9761 | 0.0180    | 0.94082 - 1.00000    |
| 292.0995                               | 66  | 0.8705 | 0.0467    | 0.77890 - 0.96215    |
| 310.1148                               | 66  | 0.9568 | 0.0310    | 0.89600 - 1.00000    |
| 491.1754                               | 66  | 0.9412 | 0.0359    | 0.87092 - 1.00000    |

**d**

| Validation Set Normalized to Creatinine |     |        |           |                      |
|-----------------------------------------|-----|--------|-----------|----------------------|
| m/z                                     | Obs | AUC    | Std. Err. | [95% Conf. Interval] |
| 115.0498                                | 88  | 0.5829 | 0.0616    | 0.46229 - 0.70360    |
| 133.0600                                | 88  | 0.6501 | 0.0589    | 0.53462 - 0.76564    |
| 144.1241                                | 88  | 0.8026 | 0.0480    | 0.70844 - 0.89672    |
| 186.0762                                | 88  | 0.7974 | 0.0484    | 0.70259 - 0.89224    |
| 225.0845                                | 88  | 0.5897 | 0.0612    | 0.46975 - 0.70957    |
| 241.0903                                | 88  | 0.6739 | 0.0589    | 0.55850 - 0.78930    |
| 254.0859                                | 88  | 0.7850 | 0.0480    | 0.69100 - 0.87903    |
| 292.0995                                | 88  | 0.7447 | 0.0526    | 0.64152 - 0.84789    |
| 310.1148                                | 88  | 0.7085 | 0.0562    | 0.59837 - 0.81868    |
| 491.1754                                | 88  | 0.7540 | 0.0522    | 0.65163 - 0.85638    |

**Supplementary Table 1:** Effect of Creatinine Normalization on AUC in Randomly Selected Subset of Urine samples from Discovery (Haiti) and Validation (Vietnam) Cohorts. AUC of molecules in randomly selected subset of 66 participant urine samples prior to (a) and after (c) normalization to creatinine concentration in discovery cohort. AUC of randomly selected subset of 88 participant urine samples prior to (b) and after (d) creatinine normalization in validation cohort.

AUC= area under receiver operator characteristic curve, Obs= number of samples used in calculation (samples excluded if molecule ion counts below limit of detection).

**Supplementary Table 2:  
List of Molecules Found to be  
Significantly Different in TB  
Cases (n=102) versus Matched  
Controls (n=102) in Discovery  
(Haitian) Cohort.** Analysis was  
performed as described in methods  
section. Molecules were declared  
significant if p-value <0.0001 after  
adjustment for false discovery rate  
and if posterior non-null probability  
>0.9. Molecules listed as neutral  
mass.

RT=retention time, ROC=receiver  
operator curve, Obs= number of  
samples used in calculation  
(samples excluded if molecule ion  
counts below limit of detection).  
Area= molecule abundance. Std  
Err=standard error.

| Mass    | RT    | Obs | Area   | Std. Err. | ROC                  |         |
|---------|-------|-----|--------|-----------|----------------------|---------|
|         |       |     |        |           | [95% Conf. Interval] |         |
| 71.074  | 15.03 | 202 | 0.5553 | 0.0406    | 0.47570              | 0.63489 |
| 75.032  | 8.56  | 202 | 0.4733 | 0.0409    | 0.39317              | 0.55350 |
| 88.001  | 14.05 | 202 | 0.7657 | 0.0340    | 0.69901              | 0.83236 |
| 99.068  | 2.19  | 187 | 0.3844 | 0.0425    | 0.30106              | 0.46780 |
| 103.099 | 12.98 | 202 | 0.6827 | 0.0373    | 0.60960              | 0.75589 |
| 105.038 | 8.03  | 188 | 0.5259 | 0.0424    | 0.44269              | 0.60903 |
| 114.042 | 1.55  | 202 | 0.9125 | 0.0196    | 0.87413              | 0.95097 |
| 114.083 | 7.29  | 202 | 0.7506 | 0.0341    | 0.68382              | 0.81735 |
| 117.078 | 11.31 | 202 | 0.4718 | 0.0408    | 0.39173              | 0.55180 |
| 119.058 | 7.62  | 202 | 0.5739 | 0.0404    | 0.49467              | 0.65318 |
| 130.109 | 12.33 | 202 | 0.6840 | 0.0371    | 0.61128              | 0.75676 |
| 131.057 | 1.48  | 201 | 0.5243 | 0.0411    | 0.44372              | 0.60480 |
| 132.077 | 1.56  | 201 | 0.9347 | 0.0155    | 0.90429              | 0.96519 |
| 136.018 | 1.68  | 201 | 0.6888 | 0.0373    | 0.61558              | 0.76192 |
| 136.062 | 12.86 | 202 | 0.6121 | 0.0394    | 0.53479              | 0.68933 |
| 137.047 | 11.08 | 202 | 0.5167 | 0.0411    | 0.43614              | 0.59719 |
| 137.073 | 11.08 | 202 | 0.5150 | 0.0411    | 0.43450              | 0.59550 |
| 143.116 | 14.92 | 202 | 0.9095 | 0.0213    | 0.86770              | 0.95132 |
| 143.120 | 11.78 | 202 | 0.6639 | 0.0381    | 0.58931              | 0.73853 |
| 146.068 | 9.63  | 202 | 0.6056 | 0.0398    | 0.52757              | 0.68360 |
| 146.094 | 9.63  | 202 | 0.5966 | 0.0400    | 0.51819              | 0.67495 |
| 155.095 | 13.83 | 202 | 0.4062 | 0.0401    | 0.32766              | 0.48469 |
| 159.099 | 2.18  | 201 | 0.3253 | 0.0391    | 0.24866              | 0.40197 |
| 165.077 | 6.29  | 201 | 0.6652 | 0.0379    | 0.59094              | 0.73943 |
| 169.083 | 14.26 | 202 | 0.5847 | 0.0402    | 0.50592              | 0.66350 |
| 169.112 | 14.26 | 202 | 0.5674 | 0.0405    | 0.48804              | 0.64667 |
| 185.068 | 2.08  | 201 | 0.9324 | 0.0191    | 0.89492              | 0.96981 |
| 187.093 | 6.64  | 202 | 0.6526 | 0.0383    | 0.57751              | 0.72778 |
| 190.057 | 7.20  | 201 | 0.7076 | 0.0370    | 0.63514              | 0.77999 |
| 199.010 | 0.58  | 201 | 0.7833 | 0.0323    | 0.72001              | 0.84664 |
| 199.106 | 3.09  | 201 | 0.7880 | 0.0316    | 0.72614              | 0.84982 |
| 201.145 | 11.76 | 202 | 0.7019 | 0.0366    | 0.63010              | 0.77363 |
| 217.136 | 2.14  | 201 | 0.4099 | 0.0405    | 0.33045              | 0.48932 |
| 220.082 | 5.98  | 201 | 0.8316 | 0.0279    | 0.77687              | 0.88643 |
| 224.078 | 6.22  | 202 | 0.8650 | 0.0255    | 0.81511              | 0.91489 |
| 228.178 | 11.61 | 202 | 0.6250 | 0.0392    | 0.54809              | 0.70191 |
| 240.084 | 1.77  | 201 | 0.8596 | 0.0254    | 0.80984              | 0.90932 |
| 240.145 | 12.02 | 203 | 0.6529 | 0.0382    | 0.57796              | 0.72780 |
| 245.114 | 2.90  | 201 | 0.7248 | 0.0359    | 0.65437              | 0.79523 |
| 253.078 | 3.32  | 201 | 0.9175 | 0.0201    | 0.87814              | 0.95687 |
| 258.094 | 3.11  | 201 | 0.8174 | 0.0291    | 0.76038              | 0.87440 |
| 258.128 | 3.11  | 201 | 0.8180 | 0.0290    | 0.76110              | 0.87487 |
| 278.120 | 1.57  | 199 | 0.7864 | 0.0333    | 0.72122              | 0.85162 |
| 287.315 | 2.82  | 202 | 0.5842 | 0.0410    | 0.50383              | 0.66460 |
| 291.092 | 2.10  | 201 | 0.9049 | 0.0219    | 0.86200              | 0.94786 |
| 297.104 | 2.44  | 201 | 0.7768 | 0.0324    | 0.71327              | 0.84030 |
| 309.106 | 2.56  | 201 | 0.9416 | 0.0164    | 0.90945              | 0.97369 |
| 324.189 | 14.09 | 201 | 0.7900 | 0.0315    | 0.72830              | 0.85162 |
| 490.162 | 2.51  | 194 | 0.9208 | 0.0209    | 0.87979              | 0.96183 |

**Supplementary Table 3: Characteristics of 20 Participants with Pulmonary Tuberculosis Followed Longitudinally (Discovery Cohort).** All participants had positive sputum AFB at enrollment. Urine samples were taken prior to initiation of anti-tuberculosis therapy and at day 60 of treatment. Participants were followed for 6 months to ensure sustained treatment response.

\*One participant was HIV positive, CD4 count was 538 at the time of enrollment.

| <b>Patient Characteristics</b> | <b>Mean (range or percentile)</b> |
|--------------------------------|-----------------------------------|
| Age (range)                    | 36 (19-57)                        |
| Sex (% male)                   | M 10 (50%)                        |
| Average Weight (range)         | 115.8 lbs (79-172)                |
| HIV positive*                  | 1 (5%)                            |
| <b>Symptoms</b>                |                                   |
| Fever                          | 12 (60%)                          |
| Night sweats                   | 12 (60%)                          |
| Cough                          | 19 (95%)                          |
| Weight loss                    | 17 (85%)                          |
| Dyspnea                        | 2 (10%)                           |
| Hemoptysis                     | 1 (5%)                            |
